# Supplementary material for: Results from the International Halocarbons in Air Comparison Experiment (IHALACE)
Source: Copernicus journal article supplement (doi:10.5194/amt-7-469-2014), 2014-02-10
Supplement: Supplementary file 1 [file amt-7-469-2014-supplement.zip]

Table S1: Scale and data set definitions. Scales are typically named according to their source and year of adoption. See Table 1 for laboratory abbreviations.

Additional data: 9.1: ADS MS at University of Bristol; 9.2: MS at Mace Head, Ireland; 17.1: MD at Cape Grim, Tasmania;

17.2: MS at Cape Grim, Tasmania; 11.1 Univ. Urbino converted to SIO-05 scales, when possible.

| Lab # |                | N2O      | SF6     | CFC-12  | CFC-11  | CFC-113 | CFC-114 | CFC-115 | CFC13       | CH3CCI3 | CCl4    | HCFC-22 | HCFC-141b |
|-------|----------------|----------|---------|---------|---------|---------|---------|---------|-------------|---------|---------|---------|-----------|
| 1     | NOAA           | NOAA-06  | NOAA-06 | NOAA-08 | NOAA-92 | NOAA-03 |         |         |             | NOAA-03 | NOAA-08 |         |           |
| 1.1   | NOAA MS        |          |         |         |         | NOAA-MS |         |         |             | NOAA-03 |         | NOAA-06 | NOAA-94   |
| 2     | SIO MD         | SIO-98   |         | SIO-05  | SIO-05  | SIO-05  |         |         |             | SIO-05  | SIO-05  |         |           |
| 2.1   | SIO MS         |          | SIO-05  | SIO-05  | SIO-05  | SIO-05  | SIO-05  | SIO-05  |             | SIO-05  | SIO-05  | SIO-05  | SIO-05    |
| 3     | SAWS           | NOAA-06  |         | NOAA-08 | NOAA-92 | NOAA-03 |         |         |             | NOAA-03 | NOAA-08 |         |           |
| 4     | ENEA           |          | NOAA-06 |         |         |         |         |         |             |         |         | NOAA-06 | NOAA-94   |
| 5     | EC             | NOAA-06  | NOAA-06 |         |         |         |         |         |             |         |         |         |           |
| 6     | UM-1           |          |         | SIO-05  | SIO-05  | SIO-05  |         |         |             | SIO-05  | SIO-05  |         |           |
| 6.1   | UM-1           |          |         | NOAA-08 | NOAA-92 | NOAA-03 |         |         |             | NOAA-03 | NOAA-08 |         |           |
| 7     | NIST           | NIST-SRM |         | NIST-98 | NIST-98 | NIST-04 |         |         |             | NIST-04 | NIST-04 |         |           |
| 8     | KIT            | NOAA-06  |         |         |         |         |         |         |             |         |         |         |           |
| 9     | UB MD          | SIO-98   |         | SIO-05  | SIO-05  | SIO-05  |         |         |             | SIO-05  | SIO-05  |         |           |
| 9.1   | UB MS1         |          | SIO-05  |         |         | SIO-05  | SIO-05  | SIO-05  |             | SIO-05  | SIO-05  | SIO-05  | SIO-05    |
| 9.2   | UB MS2         |          | SIO-05  |         |         |         | SIO-05  | SIO-05  |             |         |         | SIO-05  | SIO-05    |
| 10    | UCI-1          |          |         |         |         |         |         |         |             |         |         |         |           |
| 11    | UU             |          | UB-98   | SIO-05  | SIO-05  | SIO-05  | UB-98   | UB-98   |             | SIO-05  | SIO-05  | SIO-05  | UB-98     |
| 11.1  | UU (converted) |          | SIO-05  |         |         |         | SIO-05  | SIO-05  |             |         |         |         | SIO-05    |
| 12    | UF             | NOAA-06  | NOAA-06 | NOAA-08 | NOAA-92 | NOAA-03 |         |         |             | NOAA-03 | NOAA-08 | NOAA-06 | NOAA-94   |
| 13    | UH             | SIO-98   | UH      |         |         |         |         |         |             |         |         |         |           |
| 14    | EMPA           | SIO-98   | SIO-05  | SIO-05  | SIO-05  | SIO-05  | SIO-05  | SIO-05  |             | SIO-05  | SIO-05  | SIO-05  | SIO-05    |
| 15    | UM-2           | NIST-SRM |         | NCAR/UM | NCAR/UM | NCAR/UM | NCAR-P  | NCAR-P  |             | NCAR/UM | NCAR/UM | NCAR/UM | NCAR/UM   |
| 16    | NIES           |          |         |         | NIES-05 |         | NIES-05 |         | NIES-05     | NIES-05 |         | NIES-05 | NIES-05   |
| 17    | CSIRO Gaslab   | NOAA-92  |         |         |         |         |         |         |             |         |         |         |           |
| 17.1  | CSIRO MD       | SIO-98   | SIO-05  | SIO-05  | SIO-05  | SIO-05  |         |         |             | SIO-05  | SIO-05  |         |           |
| 17.2  | CSIRO MS       |          | SIO-05  | SIO-05  | SIO-05  | SIO-05  | SIO-05  | SIO-05  | provisional | SIO-05  | SIO-05  | SIO-05  | SIO-05    |
| 18    | NASA           |          |         |         |         |         |         |         |             |         |         |         |           |
| 19    | UCI-2          |          |         | UCI-2   | UCI-2   | UCI-2   | NCAR/UM |         |             | UCI-2   | UCI-2   | NCAR/UM | NCAR/UM   |

| HCFC-142b | HFC-134a | HFC-152a  | h1211   | h1301   | h2402   | CHCl3   | CH2Cl2  | CH4         | CH3Cl   | CH3Br   | CH3I    | CH2Br2  | CHBr3   | Lab # |
|-----------|----------|-----------|---------|---------|---------|---------|---------|-------------|---------|---------|---------|---------|---------|-------|
|           |          |           | NOAA-06 |         |         |         |         | NOAA-04     |         |         |         |         |         | 1     |
| NOAA-94   | NOAA-95  | NOAA-2004 | NOAA-92 | NOAA-06 | NOAA    | NOAA-03 | NOAA-03 |             | NOAA-03 | NOAA-03 | NOAA-04 | NOAA-03 | NOAA-03 | 1.1   |
|           |          |           |         |         |         | SIO-98  |         | Tohoku Univ |         |         |         |         |         | 2     |
| SIO-05    | SIO-05   | SIO-05    | SIO-05  | SIO-05  |         | SIO-98  |         |             | SIO-05  | SIO-05  |         |         |         | 2.1   |
|           |          |           |         |         |         |         |         | NOAA-04     |         |         |         |         |         | 3     |
| NOAA-94   | NOAA-95  |           |         |         |         |         |         |             |         |         |         |         |         | 4     |
|           |          |           |         |         |         |         |         | NOAA-04     |         |         |         |         |         | 5     |
|           |          |           |         |         |         |         |         |             |         |         |         |         |         | 6     |
|           |          |           |         |         |         |         |         |             |         |         |         |         |         | 6.1   |
|           |          |           |         |         |         | NIST-04 |         | NIST-98     |         |         |         |         |         | 7     |
|           |          |           |         |         |         |         |         |             |         |         |         |         |         | 8     |
|           |          |           |         |         |         | SIO-98  |         | Tohoku Univ |         |         |         |         |         | 9     |
| SIO-05    | SIO-05   | SIO-05    | SIO-05  | SIO-05  |         | SIO-98  | UB-98   |             | SIO-05  | SIO-05  |         |         |         | 9.1   |
| SIO-05    | SIO-05   | SIO-05    | SIO-05  | SIO-05  |         | SIO-98  |         |             | SIO-05  | SIO-05  |         |         |         | 9.2   |
|           |          |           |         |         |         |         | UCI-1   |             | UCI-1   | UCI     |         |         |         | 10    |
| UB-98     | UB-98    | UB-98     | SIO-98  | SIO-98  |         | UB-98   | UB-98   |             | UB-98   | UB-98   |         |         |         | 11    |
| SIO-05    | SIO-05   | SIO-05    | SIO-05  | SIO-05  |         |         |         |             | SIO-05  | SIO-05  |         |         |         | 11.1  |
| NOAA-94   | NOAA-95  |           | NOAA-06 | NOAA-06 |         | NOAA-03 | NOAA-03 |             | NOAA-03 | NOAA-03 | NOAA-04 | NOAA-03 | NOAA-03 | 12    |
|           |          |           |         |         |         |         |         | NOAA-04     |         |         |         |         |         | 13    |
| SIO-05    | SIO-05   | SIO-05    | SIO-05  | SIO-05  | NOAA-P  | SIO-98  | UB-98   | NOAA-04     | SIO-05  | SIO-05  |         |         |         | 14    |
| NCAR/UM   | NCAR/UM  |           | NCAR/UM | NCAR/UM | NCAR/UM | NCAR/UM | NCAR/UM | NIST-98     | NCAR/UM | NCAR/UM | NCAR/UM | NCAR/UM | NCAR/UM | 15    |
| NIES-05   | NIES-05  | NIES-05   |         |         |         | NIES-05 |         |             | NIES-05 | NIES-05 | NIES-05 |         |         | 16    |
|           |          |           |         |         |         |         |         | NOAA-04     |         |         |         |         |         | 17    |
|           |          |           |         |         |         | SIO-98  |         | Tohoku Univ |         |         |         |         |         | 17.1  |
| SIO-05    | SIO-05   | SIO-05    | SIO-05  | SIO-05  | NOAA-P  | SIO-98  | UB-98   |             | SIO-05  | SIO-05  |         |         |         | 17.2  |
|           |          |           |         |         |         |         |         | NOAA-04     |         |         |         |         |         | 18    |
| NCAR/UM   | NCAR/UM  |           | NCAR/UM |         | NCAR/UM | NCAR/UM | NCAR/UM |             | NCAR/UM | NCAR/UM | NCAR/UM | NCAR/UM | NCAR/UM | 19    |
